# Supplementary material for: Evaluation of a novel human IgG1 anti-claudin3 antibody that specifically recognizes its aberrantly localized antigen in ovarian cancer cells and that is suitable for selective drug delivery
Source: PubMed Central journal article supplement (PMC4741477; doi:10.18632/oncotarget.5315), 2015-09-21
Supplement: oncotarget-06-34617-s001.pdf [file oncotarget-06-34617-s001.pdf]

## SUPPLEMENTARY FIGURES

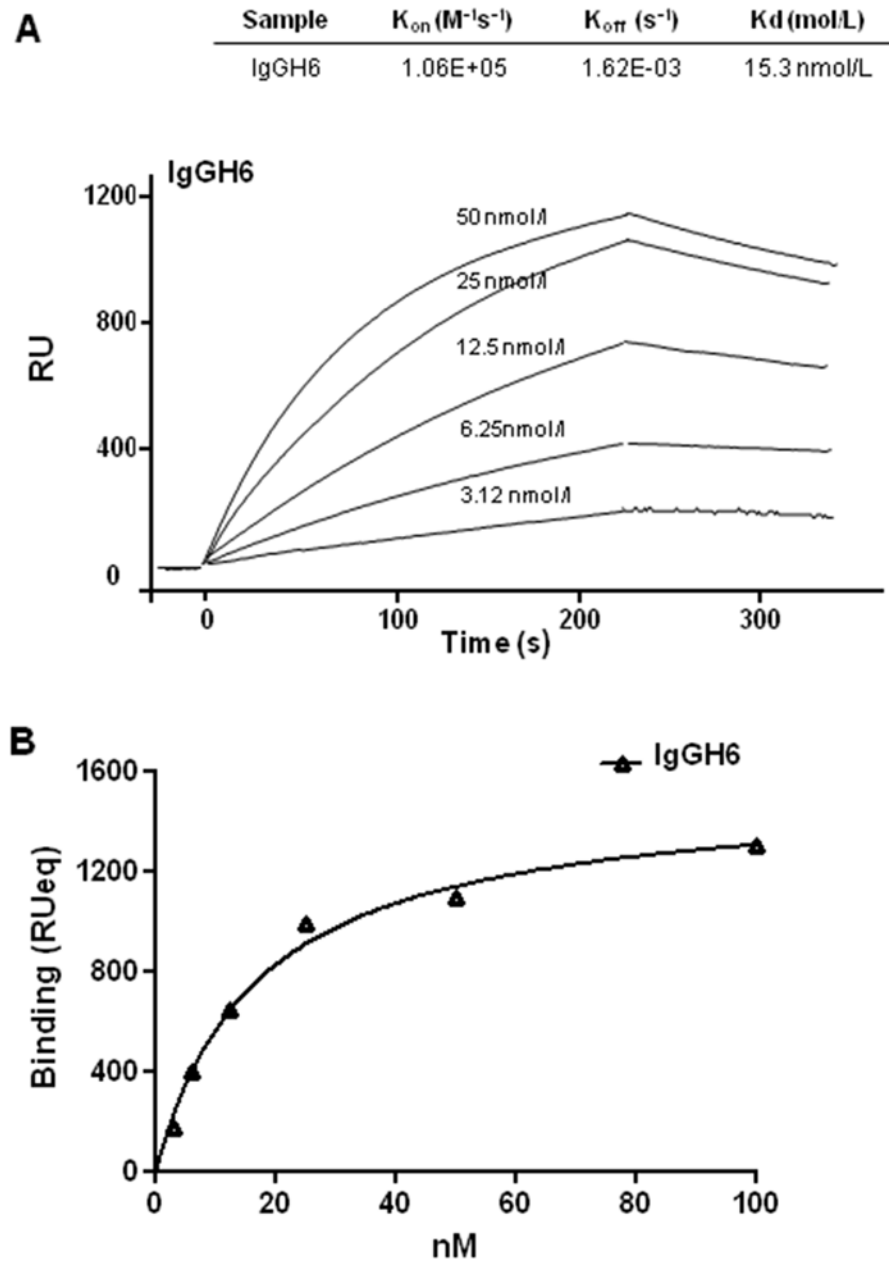

**Supplementary Figure S1: IgGH6 binding kinetics.** A. Increasing concentrations of IgGH6 were injected on an 2CL3-coated SA sensor chip. Response units (RU) were recorded as the function of time. An overlay plot is shown for all sensorgrams after subtraction of their corresponding control sensorgrams. B. Scatchard plot analysis of the equilibrium binding data.

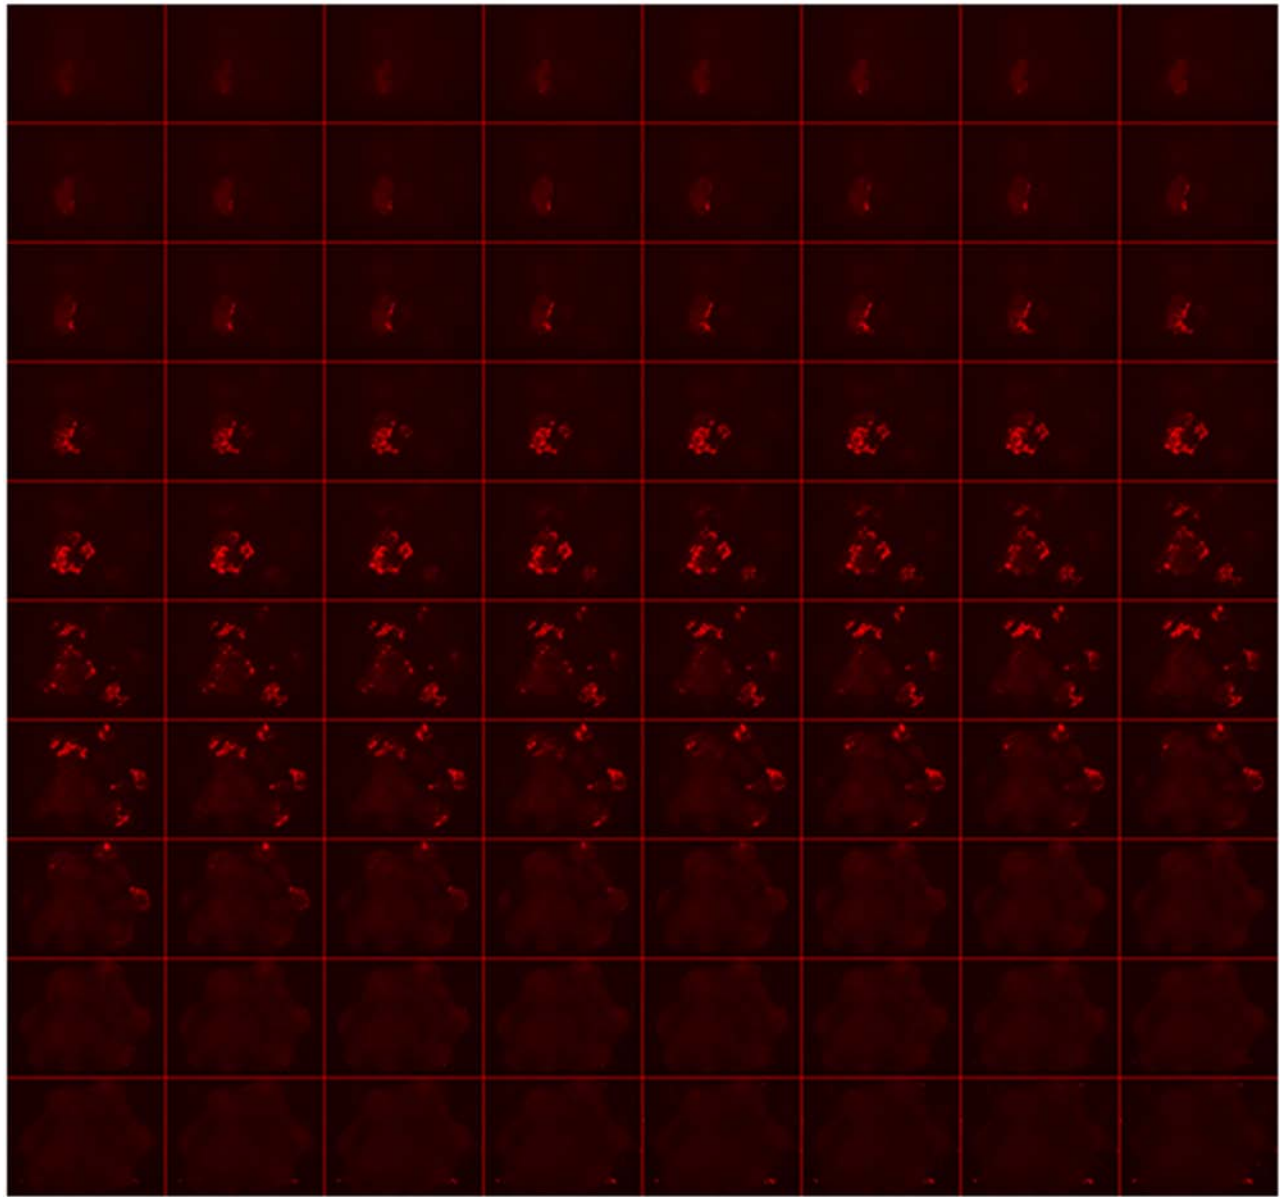

**Supplementary Figure S2: Confocal microscopy z-stack analysis of intracellular distribution of IgGH6 in USPC-4 cells.** Images were reconstructed from confocal micrographs taken every 0.25  $\mu\text{m}$  from the bottom of the culture.
